# Supplementary material for: Regional impact of large-scale climate oscillations on ice out variability in New Brunswick and Maine
Source: PeerJ. 2022 Aug 18;10:e13741. doi: 10.7717/peerj.13741 (PMC9393007; doi:10.7717/peerj.13741)
Supplement: Data S1 [file peerj-10-13741-s002.xlsx]

## Sheet: Sheet1
	Mean All Lakes	Oromocto, NB	Harvey, NB	Skiff, NB	West Grand Lake, ME
2021	101	101	100	102	101
2020	116.75	118	116	121	112
2019	120.25	119	118	124	120
2018	121.75	121	119	125	122
2017	117.75	119	116	120	116
2016	100.25	100	102	106	93
2015	120	118	121	119	122
2014	122.75	125	124	124	118
2013	111	109	110	115	110
2012	99.25	96	93	103	105
2011	113.75	113	110	118	114
2010	97.75	98	98	100	95
2009	114.75	116	114	118	111
2008	120.25	122	115	126	118
2007	115.75	119	117	104	123
2006	92	90	90	95	93
2005	111.25	108	108	115	114
2004	114	115	111	115	115
2003	125.25	126	123	126	126
2002	103.5	103	102	106	103
2001	124.25	125	123	124	125
2000	102.25	103	100	106	100
1999	101	103	100	104	97
1998	108.5	109	108	110	107
1997	123.25	125	123	127	118
1996	114.25	113	112	117	115
1995	118.5	118	115	123	118
1994	119.75	118	117	122	122
1993	115.75	114	112	120	117
1992	121.5	122	111	129	124
1991	118.75	120	117	120	118
1990	114.75	114	111	117	117
1989	125.25	127	123	125	126
1988	108.5	107	102	114	111
1987	109.75	112	107	108	112
1986	111.5	113	107	113	113
1985	112.75	112	111	115	113
1984	120.75	121	119	122	121
1983	104.25	103	101	109	104
1982	122.25	124	118	123	124
1981	101	100	100	104	100
1980	113	110	107	126	109
1979	115	118	112	117	113
1978	127.75	128	128	128	127
1977	122.5	123	121	124	122
1976	111.25	111	109	114	111
1975	126	126	124	130	124
1974	118	120		122	112
1973	118	117		120	117
1972	135.333	135		136	135
1971	127.667	128		132	123
1970	120.667	117		124	121
1969	123.667	121		126	124
1968	111.333	106		116	112
1967	126.333	127		127	125
1966	114.333	112		116	115
1965	122.667	124		122	122
1964	123	122		123	124
1963	125.333	127		125	124
1962	119.333	119		120	119
1961	130	134		124	132
1960	124	125		125	122
1959	124.333	123		126	124
1958	116.333	119		115	115
1957	119.667	120		120	119
1956	127	128		127	126
1955	116.667	116		119	115
1954	116.667	111		121	118
1953	104.333	103		112	98
1952	115.667	116		111	120
1951	106.667	104		113	103
1950	120	110		130	120
1949	107	105		110	106
1948	120.667	116		130	116
1947	120.667	120		128	114
1946	120.667	121		124	117
1945	111.333	104		127	103
1944	125.333	126		127	123
1943	125.667	126		130	121
1942	121.667	121		124	120
1941	118.333	119		119	117
1940	129	129		129	129
1939	126.333	128		120	131
1938	113.333	110		115	115
1937	120.333	118		124	119
1936	109.333	99		122	107
1935	120	107		128	125
1934	120.667	122		125	115
1933	122.667	127		122	119
1932	117	118			116
1931	118.5	126			111
1930	122.5	128			117
1929	111.5	103			120
1928	116	108			124
1927	112.5	112			113
1926	115	114			116
1925	109.5	115			104
1924	127.5	127			128
1923	129	132			126
1922	111	114			108
1921	94.5	89			100
1920	123	121			125
1919	122.5	126			119
1918	130	121			139
1917	122	120			124
1916	121	124			118
1915	110.5	111			110
1914	129.5	129			130
1913	118.5	127			110
1912	124	120			128
1911	120.5	118			123
1910	105.5	111			100
1909	121	116			126
1908	121	121			121
1907	134.5	144			125
1906	128	131			125
1905	118.5	119			118
1904	118	110			126
1903	103.5	97			110
1902	110	122			98
1901	113.5	112			115
1900	120.5	122			119
1899	117	117			117
1898	118	119			117
1897	121.5	119			124
1896	119.5	119			120
1895	119	116			122
1894	121.5	123			120
1893	121.5	114			129
1892	119.5	118			121
1891	126	128			124
1890	124.5	121			128
1889	116	116			116
1888	127	116			138
1887	125	119			131
1886	124.5	126			123
1885	117	109			125
1884	118	115			121
1883	125	121			129
1882	118.5	111			126
1881	118	113			123
1880	125	127			123
1879	120.5	111			130
1878	117.5	119			116
1877	117	117
1876	139	139
