# Supplementary material for: Regional impact of large-scale climate oscillations on ice out variability in New Brunswick and Maine
Source: PeerJ journal article supplement (doi:10.7717/peerj.13741), 2022-08-18
Supplement: Supplementary_Figure_S1.pdf [file Supplementary_Figure_S1.pdf]

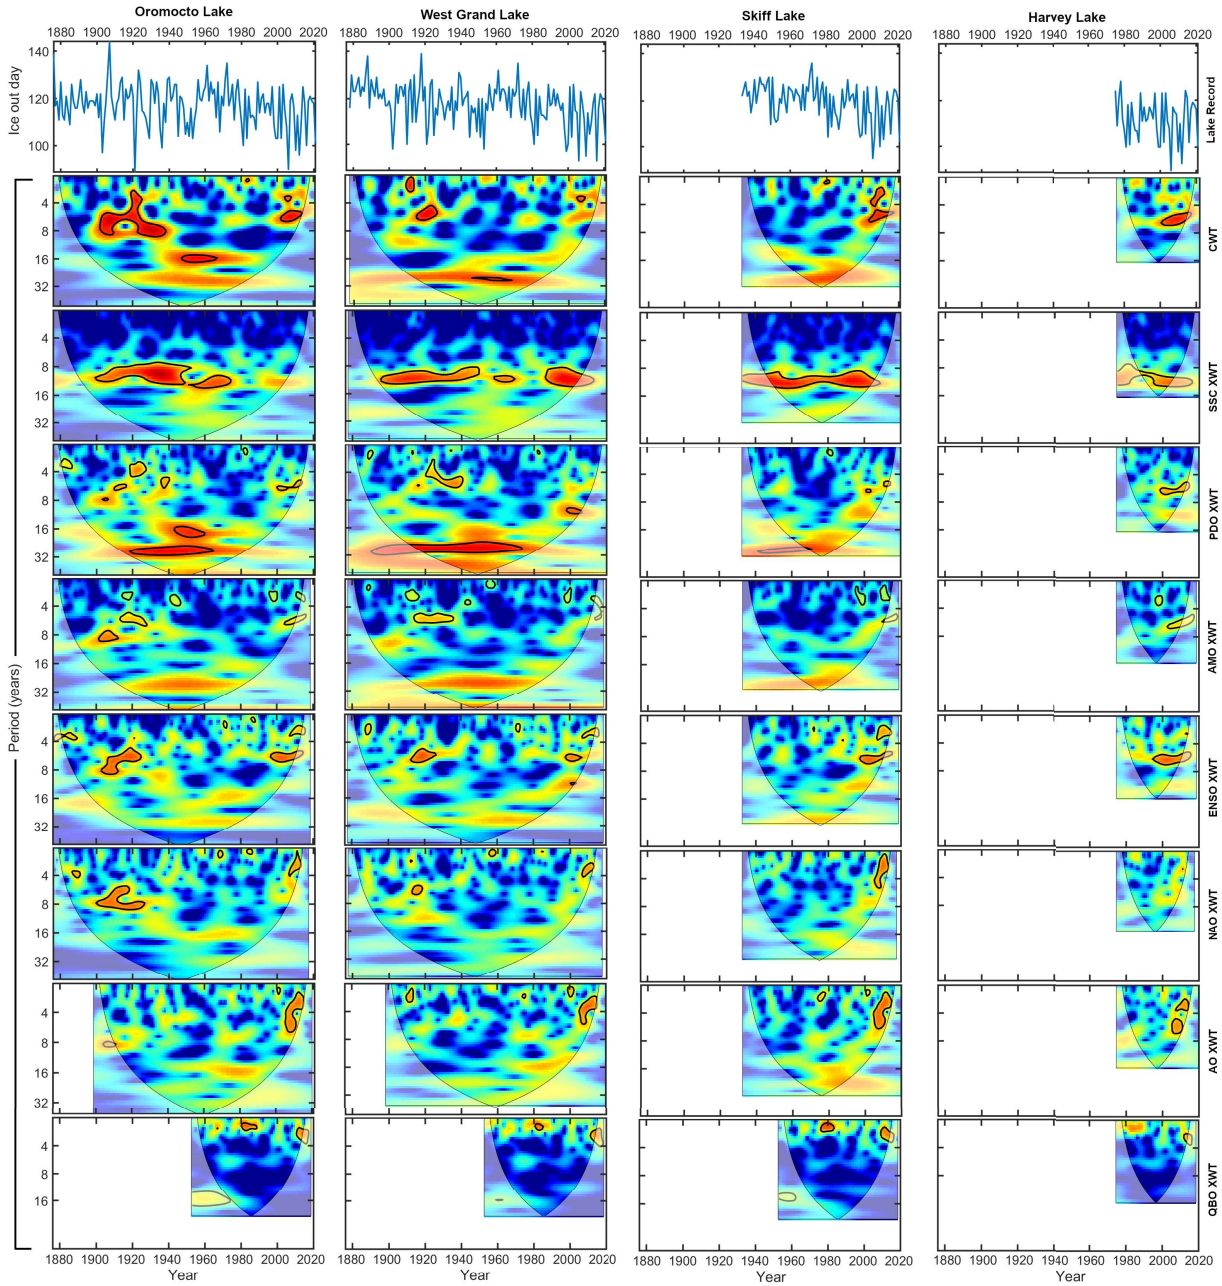

Figure S1: Graphical representation and the continuous wavelet transform (CWT) for Oromocto Lake. Cross wavelet transforms (XWTs) between lake ice out records and each of the SSC, PDO, AMO, ENSO, NAO, AO, and QBO. Time scales all span 1876–2020 for easy comparisons between the CWTs and XWTs.
